# Supplementary material for: Exploring the binding effects and inhibiting mechanism of hyperoside to lipase using multi-spectroscopic approaches, isothermal titration calorimetry, inhibition kinetics and molecular dynamics
Source: Royal Society of Chemistry journal article supplement (doi:10.1039/d2ra06715c), 2023-01-01
Supplement: d2ra06715c1.pdf [file d2ra06715c1.pdf]

**Electronic Supplementary Information for RSC Advances**

## **Supporting Information**

### **Exploring the binding effects and inhibiting mechanism of hyperoside to lipase using multi-spectroscopic, isothermal titration calorimetry, inhibition kinetics and molecular dynamics**

Zhen Zeng,<sup>a</sup> Di Wu,<sup>a\*</sup> Lan Tang,<sup>a</sup> Xia Hu,<sup>a</sup> Jing Zhang,<sup>a</sup> Fang Geng,<sup>a</sup>

- a. Meat Processing Key Laboratory of Sichuan Province, School of Food and Biological  
Engineering, Chengdu University, Chengdu 610106, China

**\* Corresponding author:**

**Dr. Di Wu**, Email: diwulab@163.com, Address: Meat Processing Key Laboratory of Sichuan  
Province, School of Food and Biological Engineering, Chengdu University, Chengdu, China

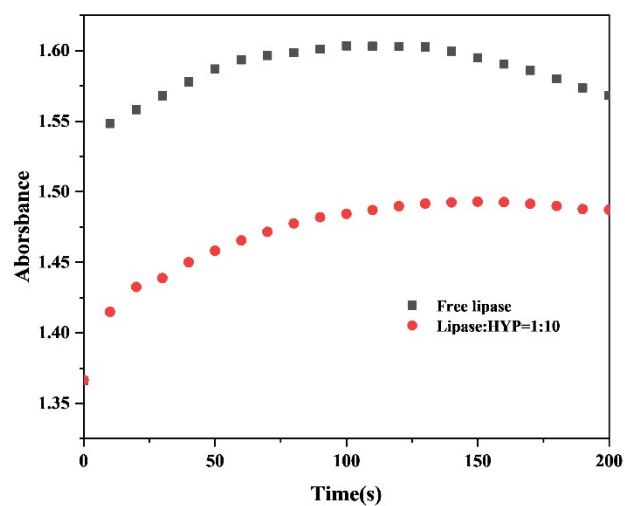

**Fig. S1** Hydrolysis curve of pNPC with lipase ( $3.0 \times 10^{-6}$  M) added with concentrations (molar ratio=1:10) of HYP.

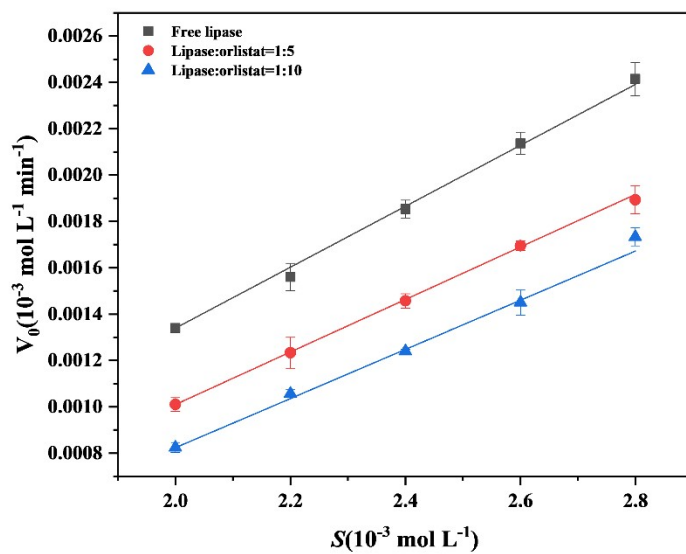

**Fig. S2** The relationship between substrate and  $V_0$  varying different orlistat concentrations.

**Table.S1** Fluorescence lifetimes of lipase with different concentrations of HYP.

| Sample         | $\tau_1$ (ns) | $\tau_2$ (ns) | $\tau_3$ (ns) | $\alpha_1$ | $\alpha_2$ | $\alpha_3$ | $\tau$ (ns) | $\chi^2$ |
|----------------|---------------|---------------|---------------|------------|------------|------------|-------------|----------|
| Free lipase    | 1.415         | 0.077         | 3.247         | 0.493      | 0.112      | 0.395      | 1.989       | 1.118    |
| lipase-HYP=1:2 | 1.459         | 0.087         | 3.118         | 0.502      | 0.123      | 0.375      | 1.912       | 1.174    |
| lipase-HYP=1:4 | 1.423         | 0.090         | 3.042         | 0.497      | 0.128      | 0.375      | 1.860       | 1.144    |

**Table.S2** Statistical analysis of the initial velocity ( $V_0$ ) of HYP concentration and pNPC concentration.

| Source             | Type III sum of squares | df | Mean square | F         | Significance |
|--------------------|-------------------------|----|-------------|-----------|--------------|
| Corrected model    | 4.480E-006 <sup>a</sup> | 14 | 3.200E-007  | 208.221   | .000         |
| Intercept          | 2.608E-005              | 1  | 2.608E-005  | 16971.471 | .000         |
| HYP concentration  | 9.074E-007              | 2  | 4.537E-007  | 295.195   | .000         |
| pNPC concentration | 3.412E-006              | 4  | 8.529E-007  | 554.978   | .000         |
| HYP*pNPC           | 1.610E-007              | 8  | 2.013E-008  | 13.099    | .000         |
| Error              | 4.611E-008              | 30 | 1.537E-009  |           |              |
| Total              | 3.061E-005              | 45 |             |           |              |
| Corrected          | 4.52E-006               | 44 |             |           |              |
